# Supplementary material for: Don’t Forget the Bones: Incidence and Risk Factors of Metabolic Bone Disease in a Cohort of Preterm Infants
Source: MDPI journal article supplement (doi:10.3390/ijms231810666), 2022-09-14
Supplement: s1 [file s1]

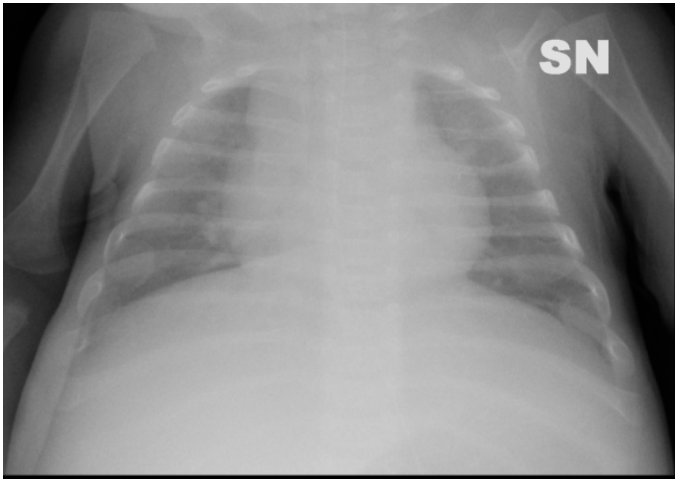

*Figure S1 - Patient a, GA 29+3, BW 650 g, male.*

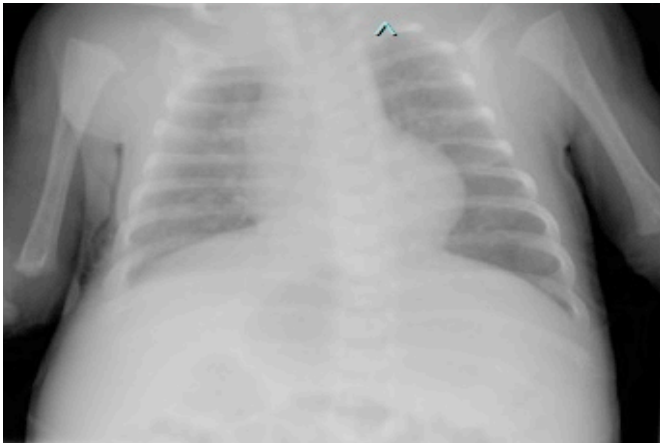

*Figure S2 - Patient b, GA 28+6, BW 570 g, female.*

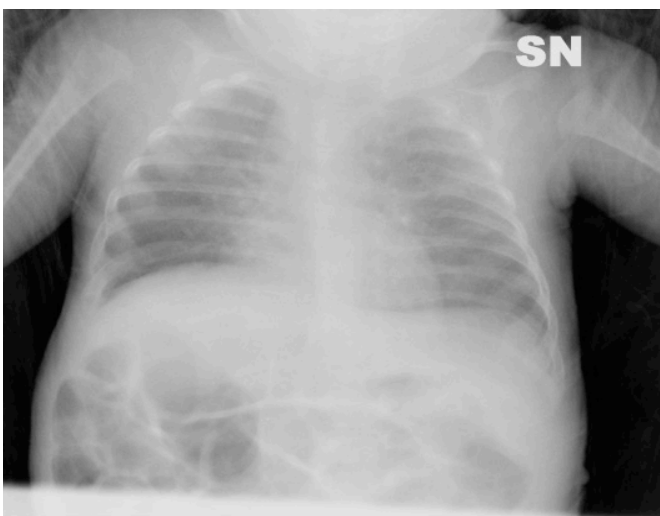

*Figure S3 - Patient c, GA 28+3, BW 640 g, male.*

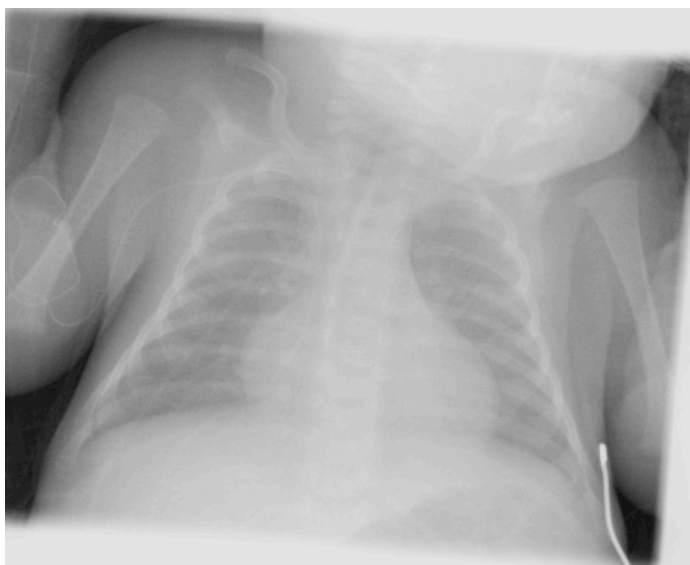

*Figure S4 - Patient d, GA 30+3, BW 960 g, female.*

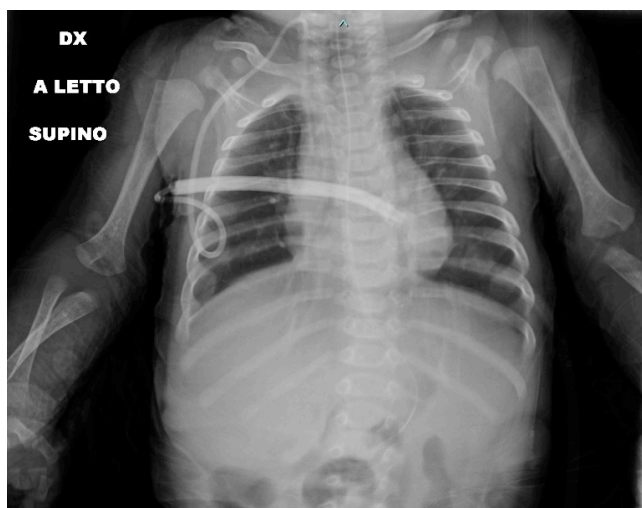

*Figure S5 - Patient e, GA 29+1, BW 890 g, male.*
